# Supplementary material for: Highly selective and sensitive detection of metal ions and nitroaromatic compounds by an anionic europium(iii) coordination polymer
Source: Royal Society of Chemistry journal article supplement (doi:10.1039/c6dt01636g), 2016-01-01
Supplement: c6dt01636g1.pdf [file c6dt01636g1.pdf]

## Supporting Information

### **Anionic Europium (III) Coordination Polymer for Highly Selective and Sensitive Detection of Fe<sup>3+</sup> and 4-Nitrophenol**

Raji Feyisa Bogale, Junwei Ye,\* Yuan Sun, Tongxin Sun, Siqi Zhang, Abdul Rauf, Cheng Hang, Peng Tian, Guiling Ning\*

State Key Laboratory of Fine Chemicals and School of Chemical Engineering, Faculty of Chemical, Environmental and Biological Science and Technology, Dalian University of Technology, Linggong Road, Dalian 116024, P. R. China

E-mail: junweiye@dlut.edu.cn; ninggl@dlut.edu.cn; Fax: +86-041184986065; Tel: +86-0411-84986067

## Figure Captions

**Fig. S1** View of 2D packing network (a) and hydrogen bonds (b) in **1**.

**Fig. S2** The photoluminescence spectrum of **1** at solid state.

**Fig. S3.** Comparison of the luminescence intensity of **1** interacting with different metal ions under the same conditions.

**Fig. S4.** Comparison of the luminescence intensity of **1** interacting with different anions in aqueous solution under the same conditions.

**Fig. S5.** Photoluminescence intensity of the  $^5D_0 \rightarrow ^7F_2$  transition (615 nm) of **1** treated with 1 mM different nitrocompounds under the same conditions.

**Fig. S6** Comparison of the luminescence intensity excited at 290 nm of **1** (0.02 mg dispersed in 3ml of ethanol) interacting with phenol and 4-Bromophenol ( 1 mM in ethanol) under the same conditions.

Fig. S7 Comparison of the luminescence intensity excited at 290 nm (a) and UV-Vis absorption spectra (b) of **1** (0.02 mg dispersed in 3ml ethanol) interacting with 160  $\mu\text{L}$   $\text{Fe}^{3+}$  (10 mM), 240  $\mu\text{L}$  4-NP (1 mM), and both mixed  $\text{Fe}^{3+}$  + 4-NP (1:1) under the same conditions

**Fig. S8** Photoluminescence emission spectra excited at 290 nm of **1** dispersed in the ethanol upon volume incremental addition of a)  $\text{Zn}^{2+}$  b)  $\text{Mg}^{2+}$  c) TNP d) 2,6-DNT

**Fig. S9** Thermogravimetric analysis of **1** before and after immersion in  $\text{Fe}^{3+}$ -containing aqueous solution

**Fig. S10.** Comparison of EDX measurements and SEM images of **1** (a, c) and  $\text{Fe}@1$  (b, d).

**Fig. S11** Absorption spectra of **1** dispersed in the ethanol and after 240  $\mu\text{L}$   $\text{Fe}^{3+}$  aqueous solution was added to the dispersed solution.

**Fig. S12** Fluorescence lifetime curves of **1** in the presence and absence of both  $\text{Fe}^{3+}$  and 4-NP analytes respectively.

**Fig. S13** UV-Vis absorption spectra of **1** dispersed in ethanol treated with different nitrocompounds.

## Table Captions

**Table S1.** Crystal data and structure refinement for **1**.

**Table S2.** Selected bond lengths and angles of **1**.

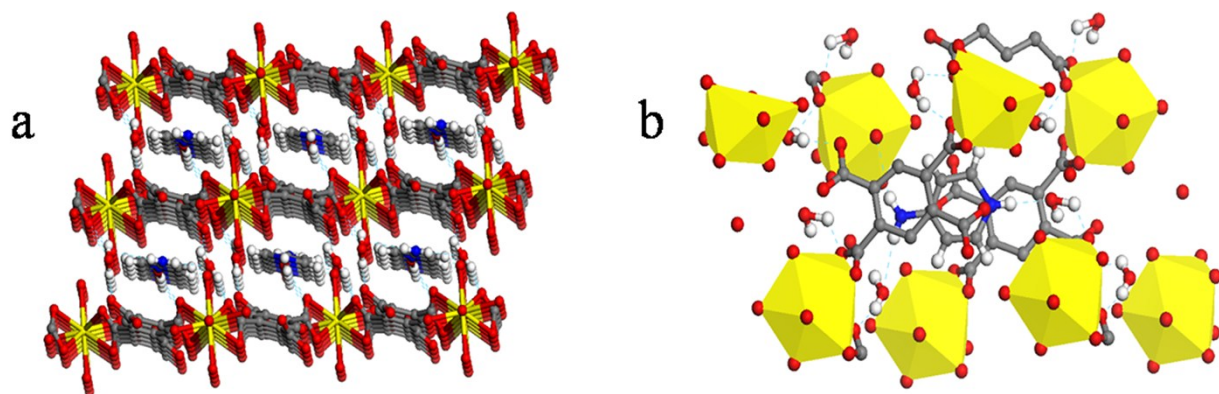

**Fig. S1** View of 2D packing network (a) and hydrogen bonds (b) in **1**.

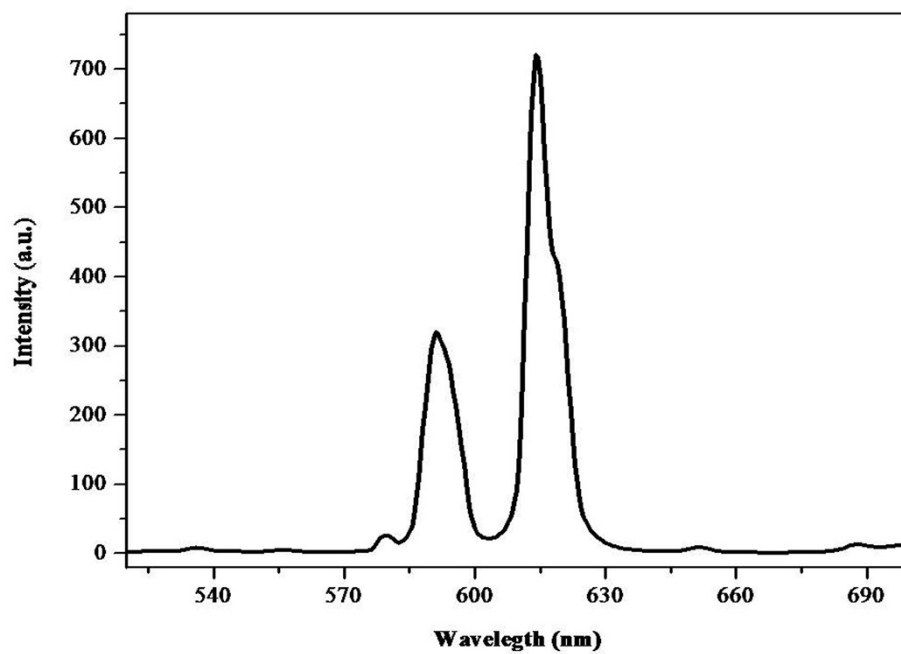

**Fig. S2** The photoluminescence spectrum of **1** at solid state.

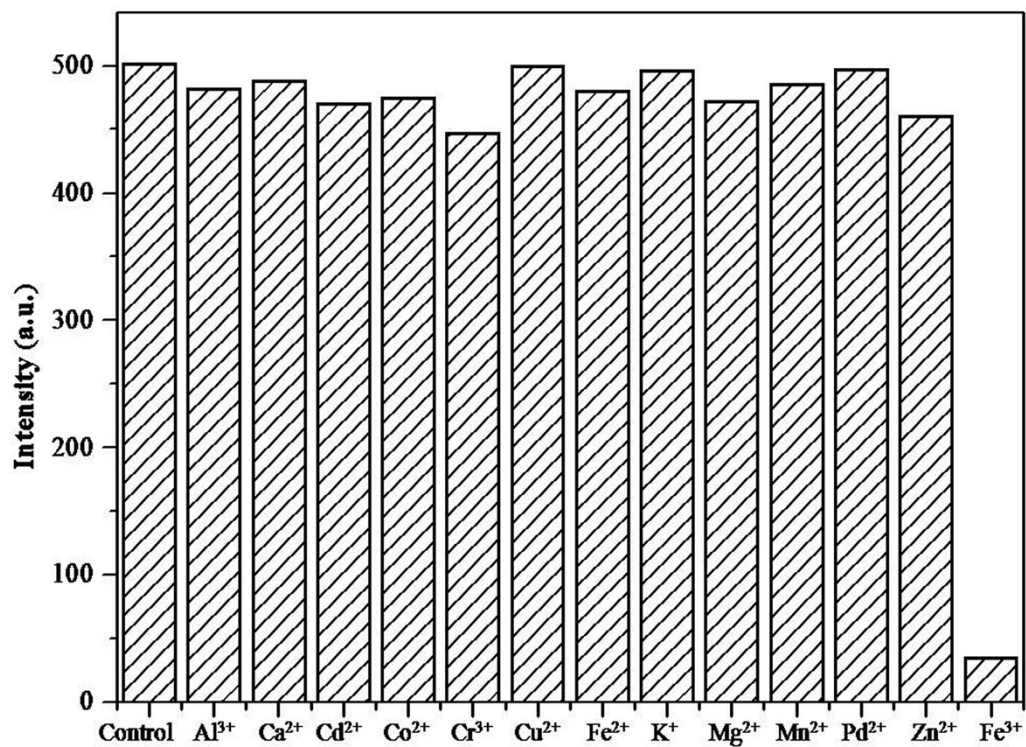

Fig. S3 Comparison of the luminescence intensity exited at 290 nm of **1** (0.02 mg in ethanol) after interacting with equal volume of 160  $\mu$ L different metal ions (10 mM in water) under the same conditions.

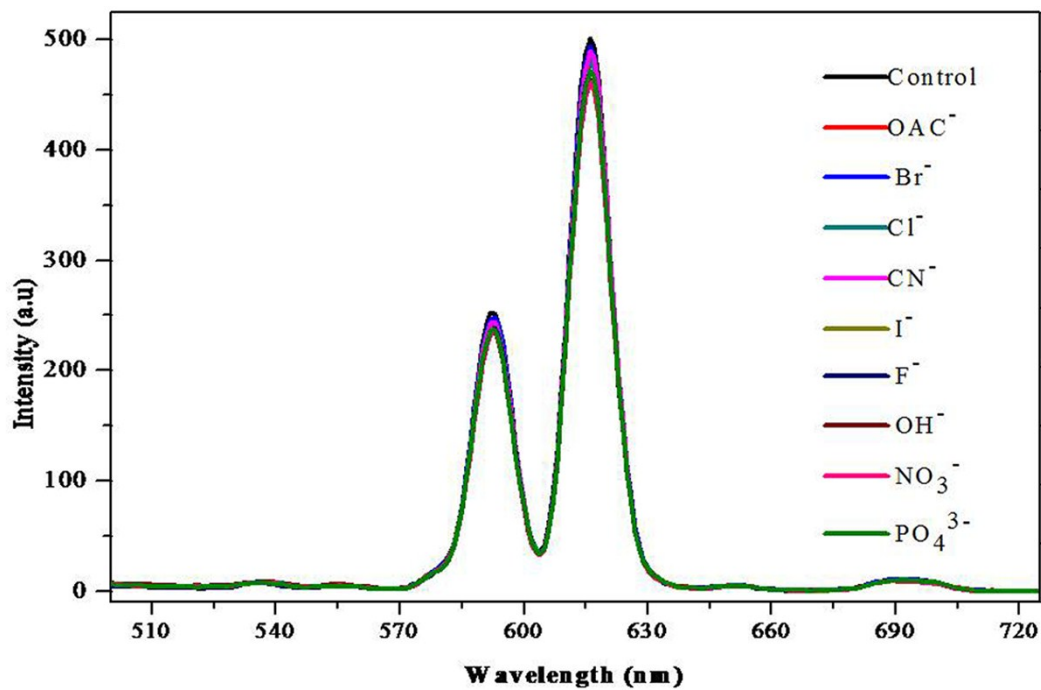

Fig. S4 Comparison of the luminescence intensity excited at 290 nm of **1** (0.02 mg dispersed in 3ml of ethanol) interacting with different anions (10 mM in water) under the same conditions.

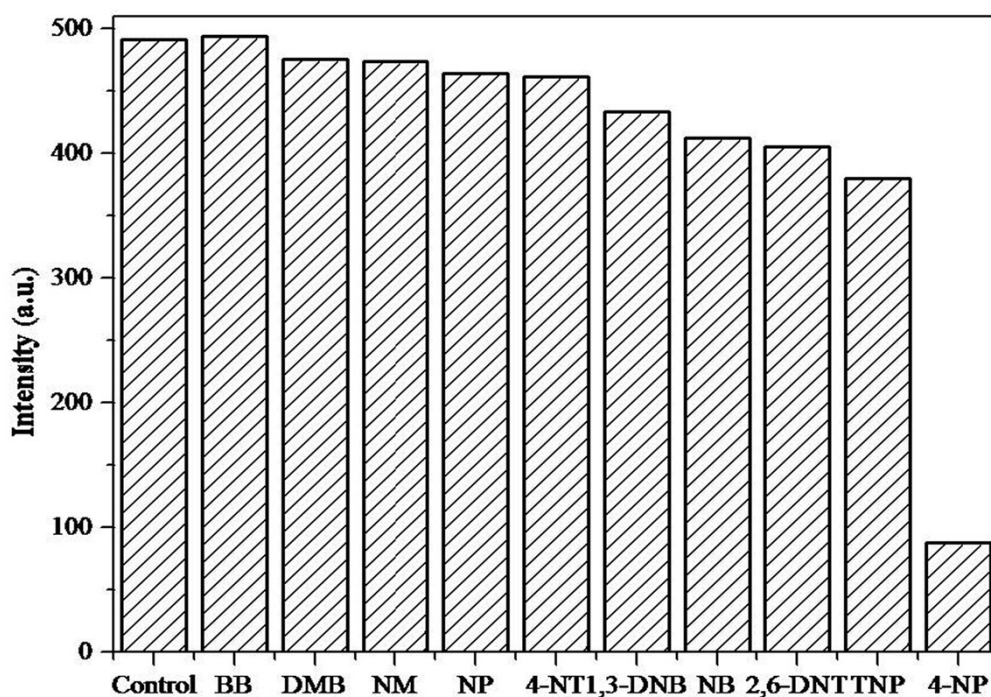

Fig. S5 Photoluminescence intensity excited at 290 nm of the  $^5D_0 \rightarrow ^7F_2$  transition (615 nm) of **1** (0.02 mg in 3 mL ethanol) after treated with equal volume of 240  $\mu$ L different nitrocompounds solution (1 mM in water) under the same conditions.

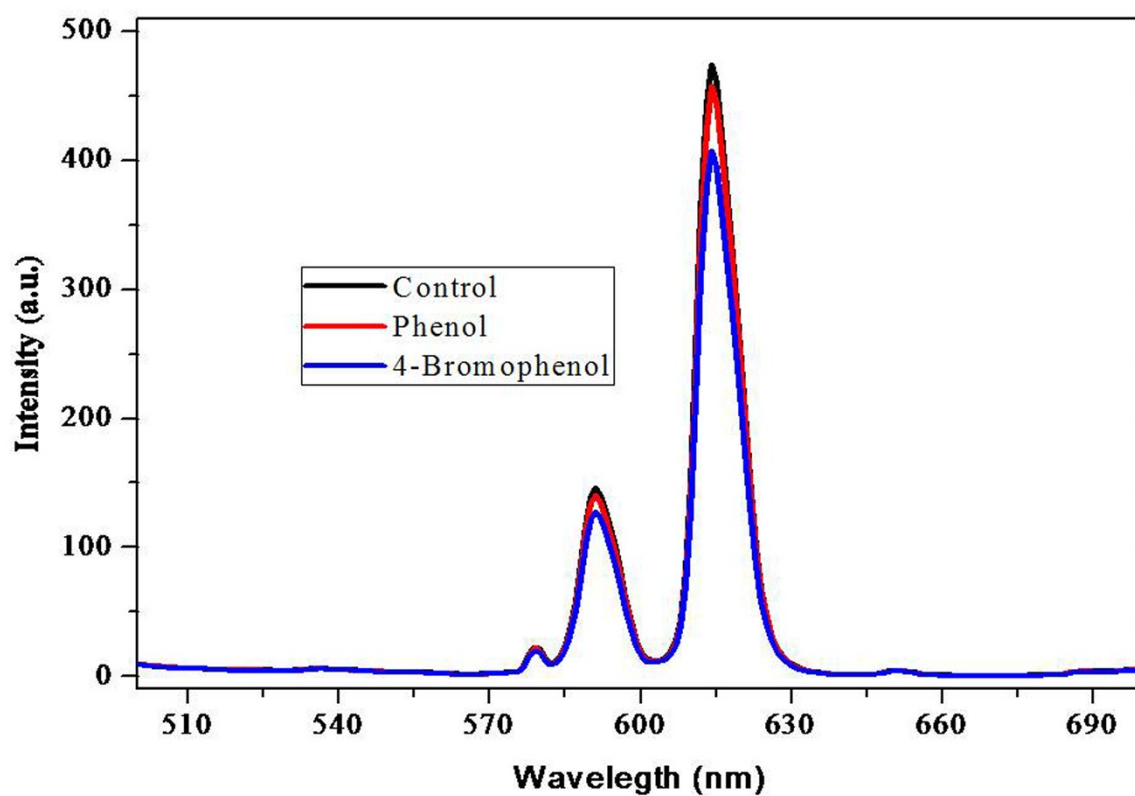

Fig. S6 Comparison of the luminescence intensity excited at 290 nm of **1** (0.02 mg dispersed in 3ml of ethanol) interacting with 240  $\mu$ L of phenol and 4-bromophenol (1 mM in ethanol) under the same conditions.



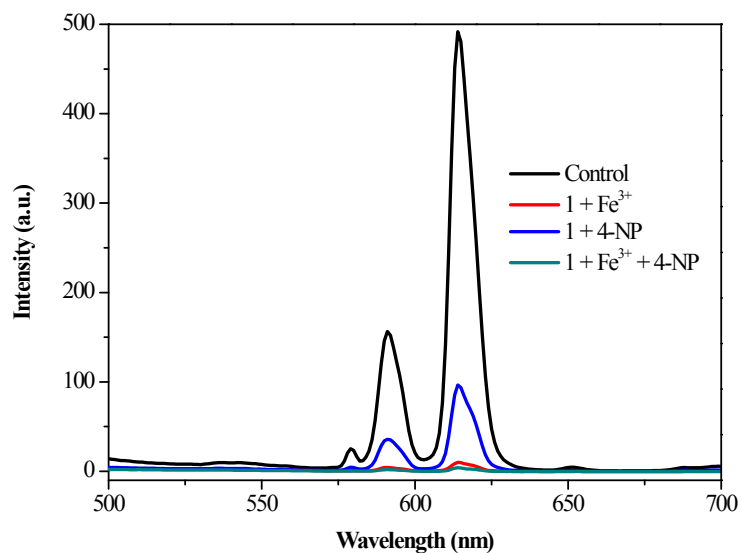

Fig. S7 Comparison of the luminescence intensity excited at 290 nm of **1** (0.02 mg dispersed in 3mL ethanol) interacting with 160  $\mu\text{L}$   $\text{Fe}^{3+}$  (10 mM), 240  $\mu\text{L}$  4-NP (1 mM), and both mixed  $\text{Fe}^{3+}$  + 4-NP (1:1) under the same conditions.

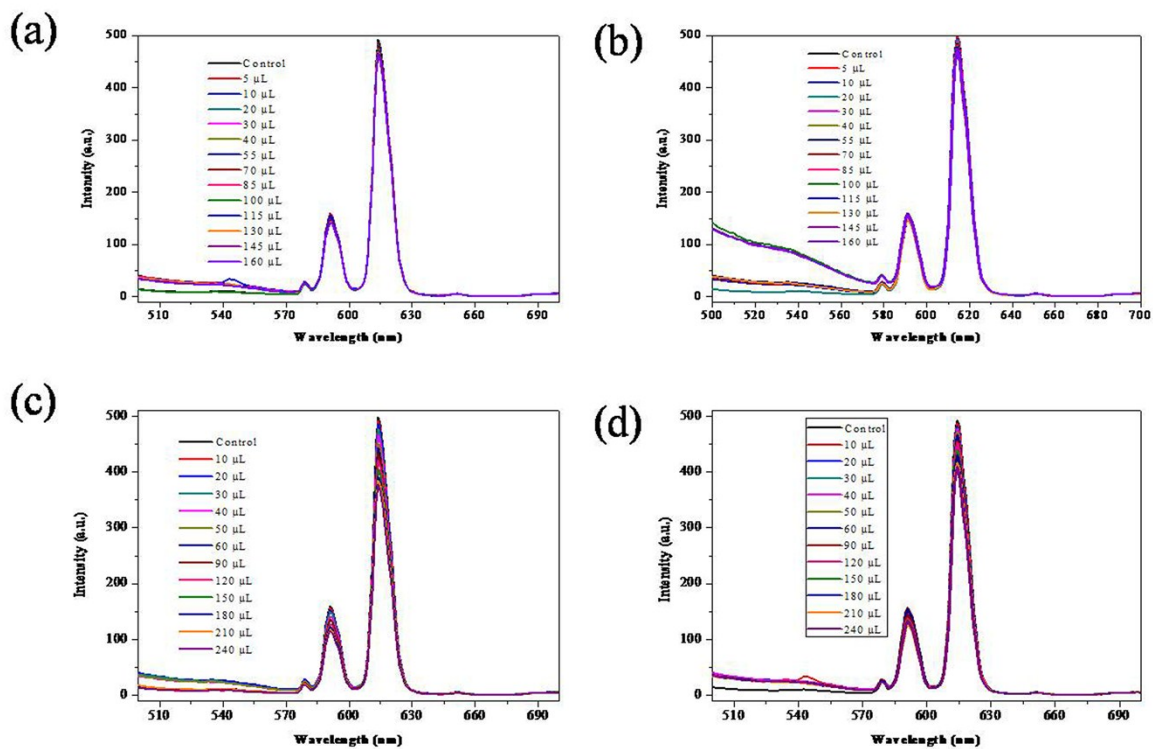

Fig. S8 Photoluminescence emission spectra excited at 290 nm of **1** (0.02 mg dispersed in the ethanol) upon volume incremental addition of a)  $Zn^{2+}$  (10 mM in water) b)  $Mg^{2+}$  (10 mM in water) c) TNP (1 mM in ethanol) d) 2,6-DNT (1 mM in ethanol)

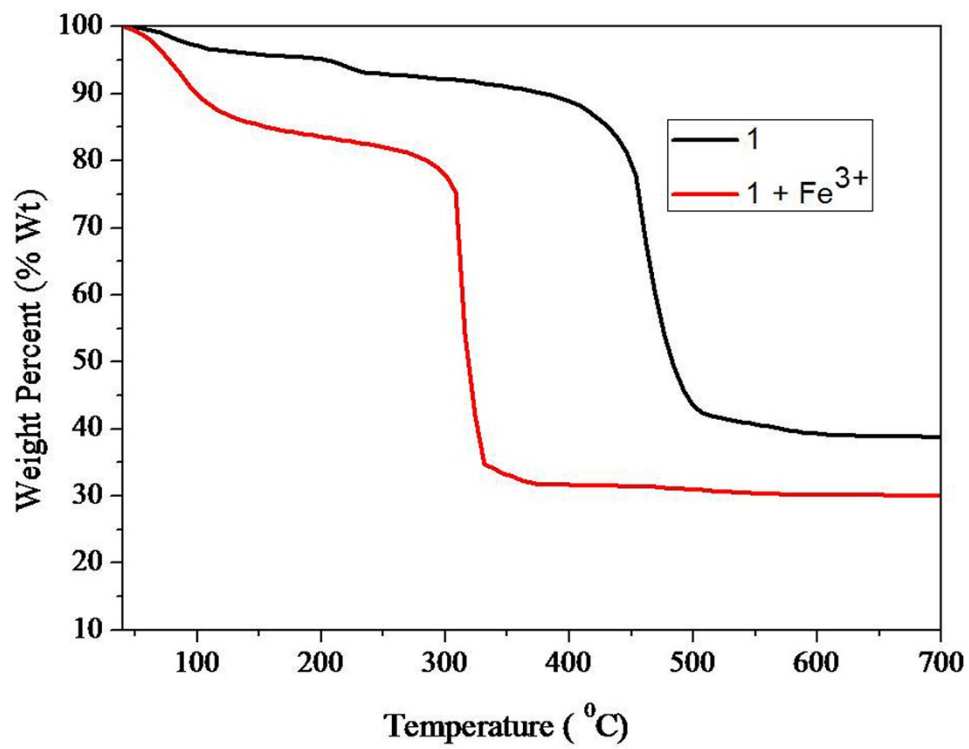

**Fig. S9** Thermogravimetric analysis of **1** before and after immersion in Fe<sup>3+</sup>-containing aqueous solution

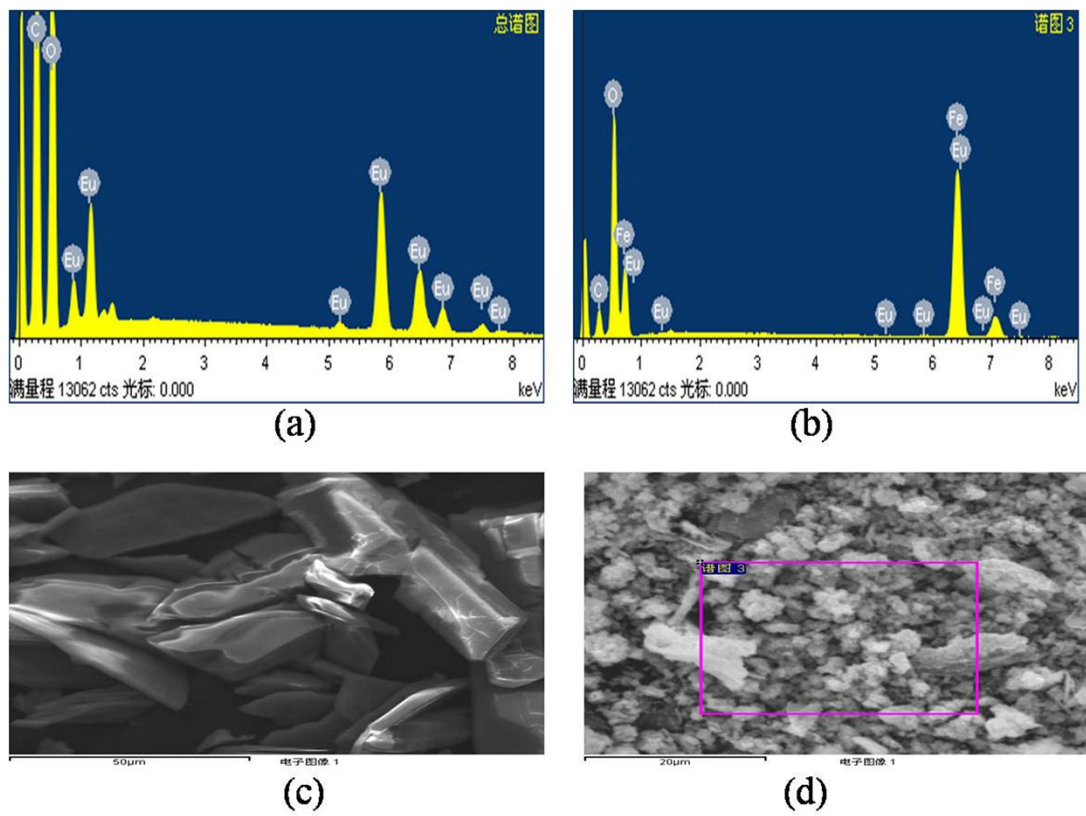

**Fig. S10** Comparison of EDX measurements and SEM images of **1** (a, c) and Fe@**1** (b, d).

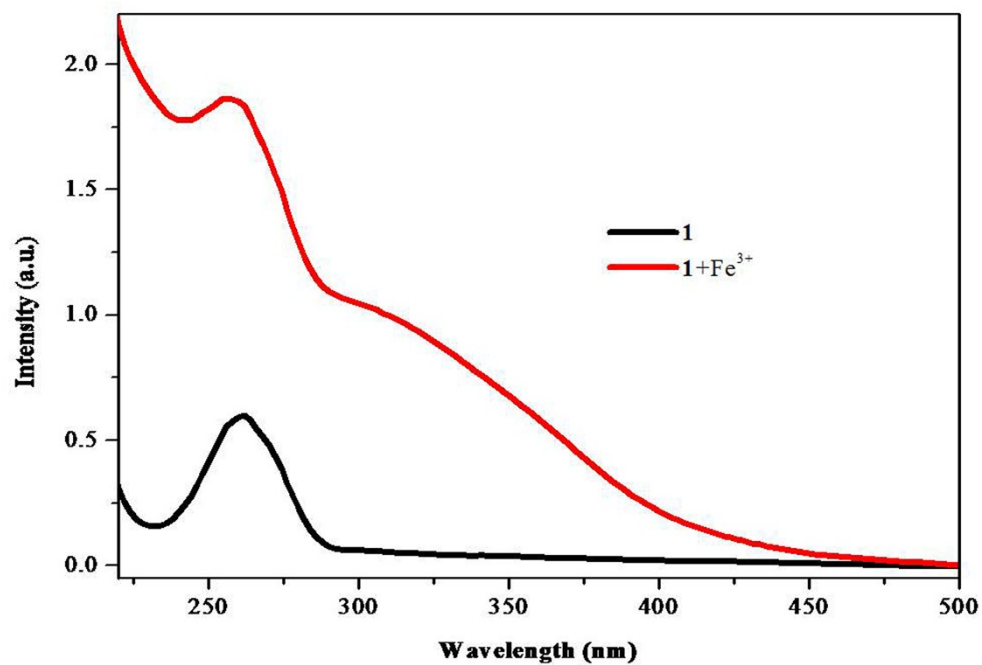

**Fig. S11** Absorption spectra of **1** dispersed in the ethanol and after 240  $\mu\text{L}$   $\text{Fe}^{3+}$  aqueous solution (10 mM) was added to the dispersed solution of **1** (0.02 mg in ethanol)

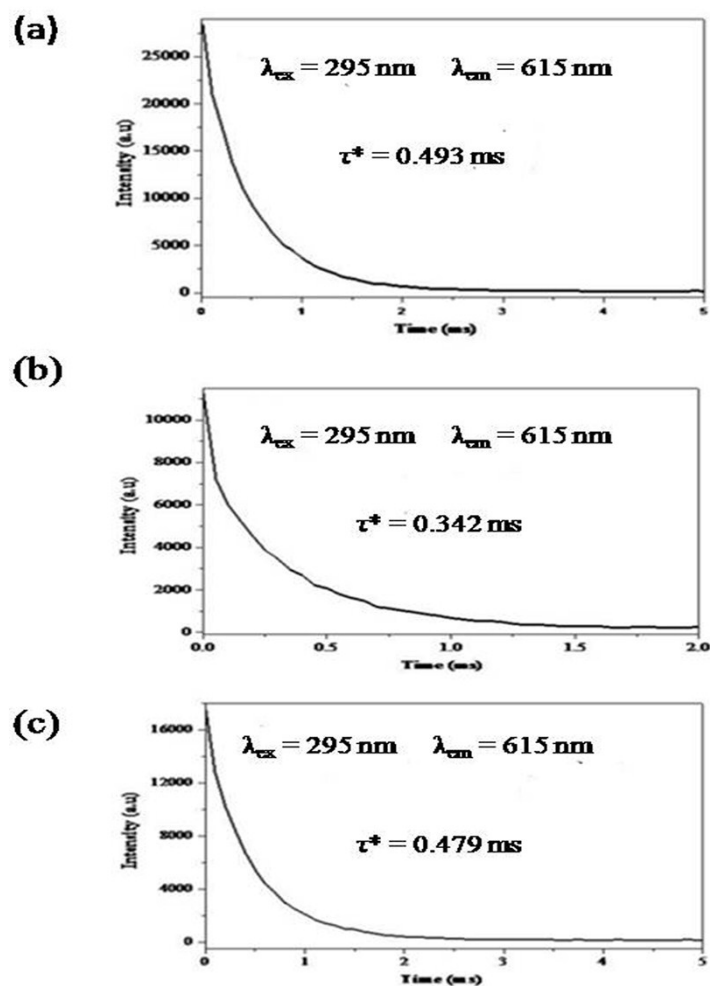

**Fig. S12** Fluorescence lifetime curves of **1** dispersed in ethanol (a), after treated with  $\text{Fe}^{3+}$  aqueous solution (160  $\mu\text{L}$ ) (b), and after treated with 4-NP (240  $\mu\text{L}$ ) (c).

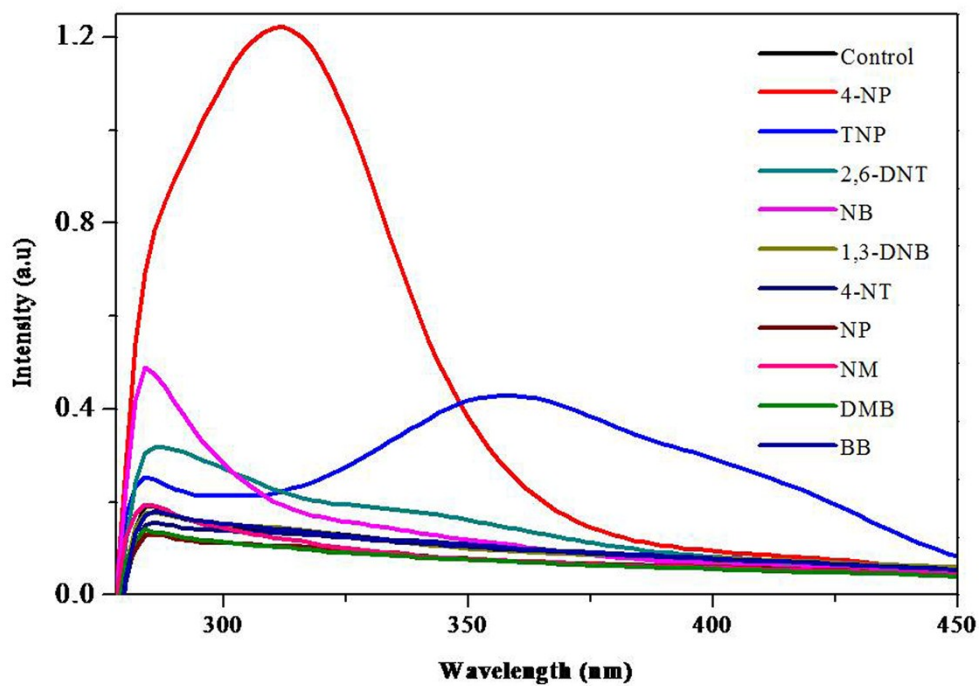

**Fig. S13** UV-Vis absorption spectra of **1** (0.96 mg dispersed in 3 mL ethanol) treated with different nitrocompounds having equal volumes ( 240  $\mu$ L) and concentration of 1 mM in ethanol for each

**Table S1** Crystal data and structure refinement for **1**.

|                                                      |                                                                  |
|------------------------------------------------------|------------------------------------------------------------------|
| Empirical formula                                    | C <sub>15</sub> H <sub>25</sub> EuN <sub>2</sub> O <sub>16</sub> |
| Formula weight                                       | 641.33                                                           |
| Crystal system                                       | Monoclinic, C2/c                                                 |
| <i>a</i> (Å)                                         | 13.0689(8)                                                       |
| <i>b</i> (Å)                                         | 11.2535(6)                                                       |
| <i>c</i> (Å)                                         | 15.4306(9)                                                       |
| $\alpha$ (°)                                         | 90                                                               |
| $\beta$ (°)                                          | 105.9080(10)                                                     |
| $\gamma$ (°)                                         | 90                                                               |
| Volume (Å <sup>3</sup> )                             | 2182.5(2)                                                        |
| <i>Z</i>                                             | 4                                                                |
| <i>D</i> <sub>Calc</sub> (mg/m <sup>3</sup> )        | 1.952                                                            |
| $\mu$ (mm <sup>-1</sup> )                            | 2.959                                                            |
| <i>F</i> <sub>(000)</sub>                            | 1280                                                             |
| <i>R</i> <sub>int</sub>                              | 0.0248                                                           |
| GOF on F <sup>2</sup>                                | 1.087                                                            |
| <i>R</i> <sub>1</sub> [ <i>I</i> > 2σ( <i>I</i> )]*  | 0.0218                                                           |
| <i>wR</i> <sub>2</sub> [ <i>I</i> > 2σ( <i>I</i> )]* | 0.0522                                                           |
| <i>R</i> <sub>1</sub> (all data) *                   | 0.0233                                                           |
| <i>wR</i> <sub>2</sub> (all data)*                   | 0.0532                                                           |

---

\* $R_1 = \sum ||F_o| - |F_c|| / \sum |F_o|$ ;  $wR_2 = \{\sum [w(F_o^2 - F_c^2)^2] / \sum [w(F_o^2)]^2\}^{1/2}$

---



**Table S2** Selected bond lengths [Å] and angles [deg] for **1**.

|                                              |            |                                              |            |
|----------------------------------------------|------------|----------------------------------------------|------------|
| Eu(1)-O(5)                                   | 2.4039(17) | Eu(1)-O(2) <sup>#1</sup>                     | 2.4596(16) |
| Eu(1)-O(5) <sup>#1</sup>                     | 2.4039(17) | Eu(1)-O(7)                                   | 2.496(2)   |
| Eu(1)-O(6) <sup>#1</sup>                     | 2.4282(19) | Eu(1)-O(1) <sup>#1</sup>                     | 2.5550(16) |
| Eu(1)-O(6)                                   | 2.4282(19) | Eu(1)-O(1)                                   | 2.5550(16) |
| Eu(1)-O(2)                                   | 2.4596(16) |                                              |            |
| O(5)-Eu(1)-O(5) <sup>#1</sup>                | 136.88(8)  | O(6) <sup>#1</sup> -Eu(1)-O(7)               | 79.36(5)   |
| O(5)-Eu(1)-O(6) <sup>#1</sup>                | 93.48(7)   | O(6)-Eu(1)-O(7)                              | 79.36(5)   |
| O(5) <sup>#1</sup> -Eu(1)-O(6) <sup>#1</sup> | 78.68(7)   | O(2)-Eu(1)-O(7)                              | 141.20(4)  |
| O(5)-Eu(1)-O(6)                              | 78.68(7)   | O(2) <sup>#1</sup> -Eu(1)-O(7)               | 141.20(4)  |
| O(5) <sup>#1</sup> -Eu(1)-O(6)               | 93.48(7)   | O(5)-Eu(1)-O(1) <sup>#1</sup>                | 140.40(6)  |
| O(6) <sup>#1</sup> -Eu(1)-O(6)               | 158.72(9)  | O(5) <sup>#1</sup> -Eu(1)-O(1) <sup>#1</sup> | 69.65(6)   |
| O(5)-Eu(1)-O(2)                              | 76.74(6)   | O(6) <sup>#1</sup> -Eu(1)-O(1) <sup>#1</sup> | 124.26(6)  |
| O(5) <sup>#1</sup> -Eu(1)-O(2)               | 143.34(6)  | O(6)-Eu(1)-O(1) <sup>#1</sup>                | 69.48(6)   |
| O(6) <sup>#1</sup> -Eu(1)-O(2)               | 120.28(6)  | O(2)-Eu(1)-O(1) <sup>#1</sup>                | 73.94(5)   |
| O(6)-Eu(1)-O(2)                              | 77.50(6)   | O(2) <sup>#1</sup> -Eu(1)-O(1) <sup>#1</sup> | 51.69(5)   |
| O(5)-Eu(1)-O(2) <sup>#1</sup>                | 143.34(6)  | O(7)-Eu(1)-O(1) <sup>#1</sup>                | 125.11(4)  |
| O(5) <sup>#1</sup> -Eu(1)-O(2) <sup>#1</sup> | 76.74(6)   | O(5)-Eu(1)-O(1)                              | 69.65(6)   |
| O(6) <sup>#1</sup> -Eu(1)-O(2) <sup>#1</sup> | 77.50(6)   | O(5) <sup>#1</sup> -Eu(1)-O(1)               | 140.40(6)  |
| O(6)-Eu(1)-O(2) <sup>#1</sup>                | 120.28(6)  | O(6) <sup>#1</sup> -Eu(1)-O(1)               | 69.48(6)   |
| O(2)-Eu(1)-O(2) <sup>#1</sup>                | 77.60(8)   | O(6)-Eu(1)-O(1)                              | 124.26(6)  |
| O(5)-Eu(1)-O(7)                              | 68.44(4)   | O(2)-Eu(1)-O(1)                              | 51.69(5)   |
| O(5) <sup>#1</sup> -Eu(1)-O(7)               | 68.44(4)   | O(2) <sup>#1</sup> -Eu(1)-O(1)               | 73.94(5)   |
| O(1) <sup>#1</sup> -Eu(1)-O(1)               | 109.78(7)  | O(7)-Eu(1)-O(1)                              | 125.11(4)  |

Symmetry transformations used to generate equivalent atoms: #1 -x, y, -z+1/2
